# Supplementary material for: Influence of F and Se substitution on the structures, stabilities and nature of the complexes between F2CSe and HOX (X = F, Cl, Br, and I)
Source: Royal Society of Chemistry journal article supplement (doi:10.1039/c5ra08034g), 2015-01-01
Supplement: c5ra08034g1.pdf [file c5ra08034g1.pdf]

## Supporting information

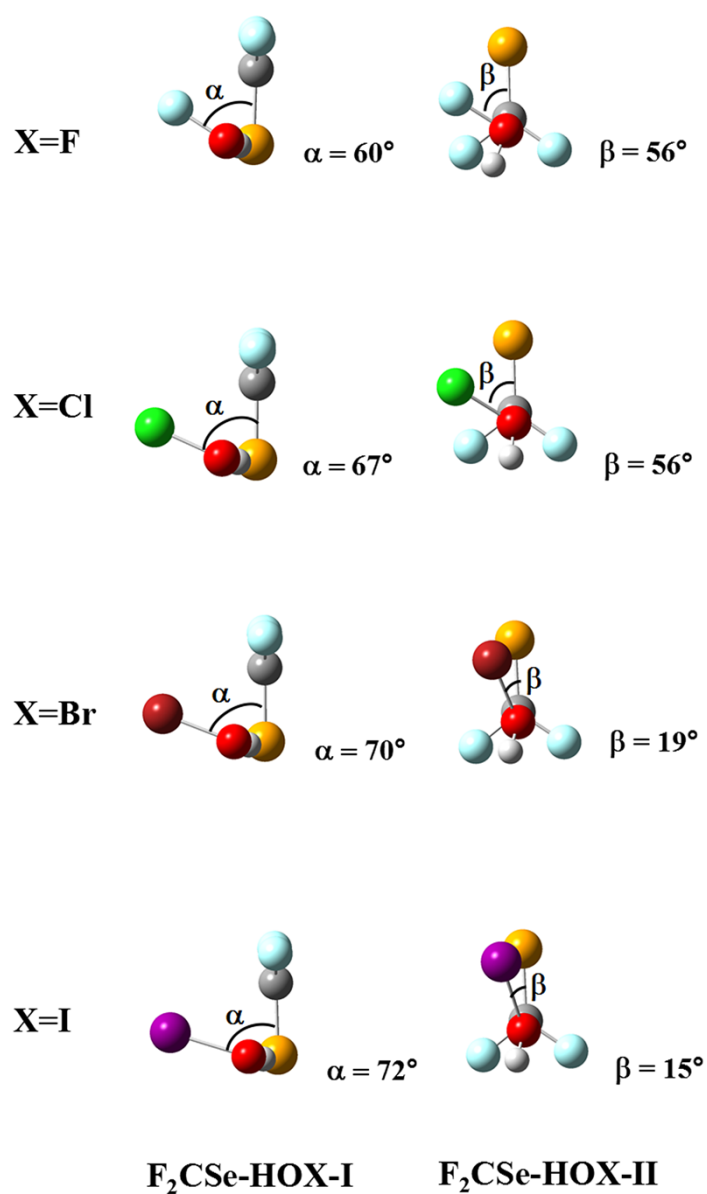

**Fig. S1.** Optimized structures of the complexes F<sub>2</sub>CSe-HOX-I and F<sub>2</sub>CSe-HOX-II.
